# Supplementary material for: Lipidomics and RNA sequencing reveal a novel subpopulation of nanovesicle within extracellular matrix biomaterials
Source: PubMed Central journal article supplement — Sci Adv. 2020 Mar 20;6(12):eaay4361. doi: 10.1126/sciadv.aay4361 (PMC7083606; doi:10.1126/sciadv.aay4361), 2020-03-20
Supplement: aay4361_SM.pdf [file aay4361_SM.pdf]

## Supplementary Materials for

### **Lipidomics and RNA sequencing reveal a novel subpopulation of nanovesicle within extracellular matrix biomaterials**

George S. Hussey, Catalina Pineda Molina, Madeline C. Cramer, Yulia Y. Tyurina, Vladimir A. Tyurin, Yoojin C. Lee, Salma O. El-Mossier, Mark H. Murdock, Peter S. Timashev, Valerian E. Kagan\*, Stephen F. Badylak\*

\*Corresponding author. Email: [badylaks@upmc.edu](mailto:badylaks@upmc.edu) (S.F.B.); [kagan@pitt.edu](mailto:kagan@pitt.edu) (V.E.K.)

Published 13 March 2020, *Sci. Adv.* **6**, eaay4361 (2020)  
DOI: 10.1126/sciadv.aay4361

#### **This PDF file includes:**

Table S1. Contents of CL, PA, PG and BMP in MBV, exosomes, and parent 3T3 cells.

## Supplementary Material

**Table S1. Contents of CL, PA, PG and BMP in MBV, exosomes, and parent 3T3 cells.** Data are presented as pmol/nmol of phospholipids, means±s.d., \*p<0.05 vs cells, #p<0.05 vs liquid-phase EV.

|                                       | <b>3T3 cells</b> | <b>Liquid-phase EV</b> | <b>MBV</b>  |
|---------------------------------------|------------------|------------------------|-------------|
| Cardiolipin, CL                       | 0.97±0.06        | 0.17±0.01*             | 0.66±0.20*  |
| Phosphatidic acid, PA                 | 0.11±0.01        | 0.64±0.29*             | 0.42±0.21   |
| Phosphatidylglycerol, PG              | 0.04±0.01        | 0.02±0.02*             | 0.11±0.02** |
| <i>bis</i> -monoglycerophosphate, BMP | 0.13±0.01        | 0.13±0.04              | 0.55±0.12#* |
